# Supplementary material for: Single-component and competitive adsorption of tetracycline and Zn(ii) on an NH4Cl-induced magnetic ultra-fine buckwheat peel powder biochar from water: studies on the kinetics, isotherms, and mechanism
Source: Royal Society of Chemistry journal article supplement (doi:10.1039/d0ra02346a), 2020-01-01
Supplement: d0ra02346a1.pdf [file d0ra02346a1.pdf]

### Figure Captions

**Fig. S1.** Particle size distribution of BHP-char and  $\text{NH}_4\text{Cl-BHP-char/Fe}_3\text{O}_4$ .

**Fig. S2.** TG and DTG profiles of BHP-char and  $\text{NH}_4\text{Cl-BHP-char/Fe}_3\text{O}_4$ .

**Fig.S3.** SEM micrographs of (a) and (d) BHP-char, (b) and (e)  $\text{NH}_4\text{Cl-BHP-char}$ , and (c) and (f)  $\text{NH}_4\text{Cl-BHP-char/Fe}_3\text{O}_4$ .

**Fig.S4.** FTIR spectra of  $\text{NH}_4\text{Cl-BHP/Fe}_3\text{O}_4$  before and after co-adsorption of  $\text{Zn}^{2+}$  and TC.

### Table Captions

Table S1. Structure and properties of TC.

Table S2. Particle size distribution of BHP-char and  $\text{NH}_4\text{Cl-BHP-char/Fe}_3\text{O}_4$ .

Table S3. Parameters of pseudo-first-order and pseudo-second-order models for the adsorption of TC and Zn(II) on BHP-char and  $\text{NH}_4\text{Cl-BHP-char/Fe}_3\text{O}_4$ .

Table S4. Parameters of isotherms for the adsorption of TC and Zn(II) on BHP-char and  $\text{NH}_4\text{Cl-BHP-char/Fe}_3\text{O}_4$ . Conditions: pH of single-component adsorption of TC was 4.0, pH of single-component adsorption of Zn(II) was 6.5, pH of co-adsorption of TC/Zn(II) was 6.0, adsorbent concentrations  $0.5 \text{ g L}^{-1}$ , temperature  $25 \text{ }^\circ\text{C}$ , contact time 120 min.

Table S5. Parameters of thermodynamic for the adsorption of TC and Zn(II) on BHP-char and  $\text{NH}_4\text{Cl-BHP-char/Fe}_3\text{O}_4$ . Conditions: pH of single-component adsorption of TC was 4.0, pH of single-component adsorption of Zn(II) was 6.5, pH of co-adsorption of TC/Zn(II) was 6.0, adsorbent concentrations  $0.5 \text{ g L}^{-1}$ , initial TC/Zn(II) concentrations  $25 \text{ mg L}^{-1}$ , contact time 120 min.

Table S6. Constants of film diffusion model for TC and Zn(II) on BHP and  $\text{NH}_4\text{Cl-BHP-char/Fe}_3\text{O}_4$ .

Table S7. Constants of Intra-particle diffusion model for TC and Zn(II) on BHP and  $\text{NH}_4\text{Cl-BHP-char/Fe}_3\text{O}_4$ .

Table S1. Structure and properties of TC.

| Compound     | Chemical formula                                              | Molecular weight | Density<br>(g cm <sup>-3</sup> ) | Refractive<br>index | Melting point<br>(°C) | flash point<br>(°C) | Molecular structure |
|--------------|---------------------------------------------------------------|------------------|----------------------------------|---------------------|-----------------------|---------------------|---------------------|
| Tetracycline | C <sub>22</sub> H <sub>24</sub> N <sub>2</sub> O <sub>8</sub> | 444.43           | 1.644                            | 1.650               | 172-174               | 431.9               |                     |

Table S2. Particle size distribution of BHP-char and NH<sub>4</sub>Cl-BHP-char/Fe<sub>3</sub>O<sub>4</sub>.

| Adsorbent                                                  | D10 <sup>a</sup> (μm) | D50 <sup>b</sup> (μm) | D90 <sup>c</sup> (μm) |
|------------------------------------------------------------|-----------------------|-----------------------|-----------------------|
| BHP-char                                                   | 34.73                 | 101.1                 | 211.3                 |
| NH <sub>4</sub> Cl-BHP-char/Fe <sub>3</sub> O <sub>4</sub> | 0.969                 | 3.889                 | 8.984                 |

<sup>a</sup> Particle diameter corresponding to 10% cumulative (from 0 to 100%) undersize particle size distribution;

<sup>b</sup> Particle diameter corresponding to 50% cumulative (from 0 to 100%) undersize particle size distribution;

<sup>c</sup> Particle diameter corresponding to 90% cumulative (from 0 to 100%) undersize particle size distribution.

Table S3. Parameters of pseudo-first-order and pseudo-second-order models for the adsorption of TC and Zn(II) on BHP-char and NH<sub>4</sub>Cl-BHP-char/Fe<sub>3</sub>O<sub>4</sub>.

| Single-component adsorption | Adsorbent                                                  | Q <sub>e,exp</sub><br>(mg g <sup>-1</sup> ) | Pseudo-first-order model |                |                       | Pseudo-second-order model               |                |                       |
|-----------------------------|------------------------------------------------------------|---------------------------------------------|--------------------------|----------------|-----------------------|-----------------------------------------|----------------|-----------------------|
|                             |                                                            |                                             | k <sub>1</sub>           | R <sup>2</sup> | Q <sub>e,cal</sub>    | k <sub>2</sub>                          | R <sup>2</sup> | Q <sub>e,cal</sub>    |
|                             |                                                            |                                             | (1 min <sup>-1</sup> )   |                | (mg g <sup>-1</sup> ) | (g mg <sup>-1</sup> min <sup>-1</sup> ) |                | (mg g <sup>-1</sup> ) |
| TC                          | BHP-char                                                   | 28.80                                       | 0.0328                   | 0.9759         | 21.53                 | 0.0050                                  | 0.9929         | 28.99                 |
|                             | NH <sub>4</sub> Cl-BHP-char/Fe <sub>3</sub> O <sub>4</sub> | 47.55                                       | 0.0307                   | 0.9921         | 38.02                 | 0.0022                                  | 0.9959         | 48.78                 |
| Zn <sup>2+</sup>            | BHP-char                                                   | 38.26                                       | 0.0734                   | 0.9798         | 25.33                 | 0.0074                                  | 0.9977         | 39.53                 |
|                             | NH <sub>4</sub> Cl-BHP-char/Fe <sub>3</sub> O <sub>4</sub> | 49.23                                       | 0.0691                   | 0.9791         | 28.51                 | 0.0094                                  | 0.9931         | 48.08                 |
| Co-adsorption               | Adsorbent                                                  | Q <sub>e,exp</sub><br>(mg g <sup>-1</sup> ) | Pseudo-first-order model |                |                       | Pseudo-second-order model               |                |                       |
|                             |                                                            |                                             | k <sub>1</sub>           | R <sup>2</sup> | Q <sub>e,cal</sub>    | k <sub>2</sub>                          | R <sup>2</sup> | Q <sub>e,cal</sub>    |
|                             |                                                            |                                             | (1 min <sup>-1</sup> )   |                | (mg g <sup>-1</sup> ) | (g mg <sup>-1</sup> min <sup>-1</sup> ) |                | (mg g <sup>-1</sup> ) |
| TC                          | BHP-char                                                   | 36.16                                       | 0.0799                   | 0.9852         | 28.59                 | 0.0064                                  | 0.9919         | 37.88                 |
|                             | NH <sub>4</sub> Cl-BHP-char/Fe <sub>3</sub> O <sub>4</sub> | 48.55                                       | 0.0871                   | 0.9798         | 29.67                 | 0.0057                                  | 0.9990         | 51.55                 |
| Zn <sup>2+</sup>            | BHP-char                                                   | 39.51                                       | 0.0928                   | 0.9806         | 18.48                 | 0.0226                                  | 0.9970         | 39.06                 |
|                             | NH <sub>4</sub> Cl-BHP-char/Fe <sub>3</sub> O <sub>4</sub> | 49.66                                       | 0.0965                   | 0.9934         | 29.92                 | 0.0109                                  | 0.9959         | 50.25                 |

Table S4. Parameters of isotherms for the adsorption of TC and Zn(II) on BHP-char and NH<sub>4</sub>Cl-BHP-char/Fe<sub>3</sub>O<sub>4</sub>.

| Single-component adsorption | Adsorbent                                                  | Langmuir              |                         |                | Freundlich            |                         |                |
|-----------------------------|------------------------------------------------------------|-----------------------|-------------------------|----------------|-----------------------|-------------------------|----------------|
|                             |                                                            | q <sub>L</sub>        | K <sub>L</sub>          | R <sup>2</sup> | K <sub>F</sub>        | n                       | R <sup>2</sup> |
|                             |                                                            | (mg g <sup>-1</sup> ) | (L mg <sup>-1</sup> )   |                |                       |                         |                |
| TC                          | BHP-char                                                   | 39.68                 | 0.3007                  | 0.9913         | 6.68                  | 1.7265                  | 0.9746         |
|                             | NH <sub>4</sub> Cl-BHP-char/Fe <sub>3</sub> O <sub>4</sub> | 106.38                | 0.8174                  | 0.9951         | 35.59                 | 1.3841                  | 0.9777         |
| Zn <sup>2+</sup>            | BHP-char                                                   | 109.89                | 0.1033                  | 0.9966         | 8.06                  | 1.3972                  | 0.9771         |
|                             | NH <sub>4</sub> Cl-BHP-char/Fe <sub>3</sub> O <sub>4</sub> | 151.52                | 0.4342                  | 0.9977         | 27.04                 | 1.5230                  | 0.9540         |
| Single-component adsorption | Adsorbent                                                  | Temkin                |                         |                | D-R                   |                         |                |
|                             |                                                            | K <sub>T</sub>        | β <sub>T</sub>          | R <sup>2</sup> | q <sub>D</sub>        | E                       | R <sup>2</sup> |
|                             |                                                            | (L g <sup>-1</sup> )  | (kJ mol <sup>-1</sup> ) |                | (mg g <sup>-1</sup> ) | (kJ mol <sup>-1</sup> ) |                |
| TC                          | BHP-char                                                   | 10.03                 | 0.4385                  | 0.9169         | 16.92                 | 2.9090                  | 0.8413         |
|                             | NH <sub>4</sub> Cl-BHP-char/Fe <sub>3</sub> O <sub>4</sub> | 38.47                 | 0.1839                  | 0.8710         | 41.16                 | 3.9724                  | 0.9148         |
| Zn <sup>2+</sup>            | BHP-char                                                   | 5.03                  | 0.1670                  | 0.9032         | 35.38                 | 2.2854                  | 0.7770         |
|                             | NH <sub>4</sub> Cl-BHP-char/Fe <sub>3</sub> O <sub>4</sub> | 24.48                 | 0.1266                  | 0.9197         | 64.94                 | 3.4598                  | 0.8874         |

| Co-adsorption    | Adsorbent                                      | Langmuir                        |                                       |        | Freundlich                      |                                 |        |
|------------------|------------------------------------------------|---------------------------------|---------------------------------------|--------|---------------------------------|---------------------------------|--------|
|                  |                                                | $q_L$<br>( $\text{mg g}^{-1}$ ) | $K_L$<br>( $\text{L mg}^{-1}$ )       | $R^2$  | $K_F$                           | $n$                             | $R^2$  |
| TC               | BHP-char                                       | 76.92                           | 0.1783                                | 0.8938 | 9.38                            | 1.5202                          | 0.9989 |
|                  | $\text{NH}_4\text{Cl-BHP-char/Fe}_3\text{O}_4$ | 126.58                          | 1.1791                                | 0.9448 | 61.14                           | 1.3307                          | 0.9948 |
| $\text{Zn}^{2+}$ | BHP-char                                       | 192.31                          | 0.081                                 | 0.7871 | 12.62                           | 1.347                           | 0.9986 |
|                  | $\text{NH}_4\text{Cl-BHP-char/Fe}_3\text{O}_4$ | 357.14                          | 1.077                                 | 0.8957 | 216.35                          | 1.157                           | 0.9943 |
| Co-adsorption    | Adsorbent                                      | Temkin                          |                                       |        | D-R                             |                                 |        |
|                  |                                                | $K_T$<br>( $\text{L g}^{-1}$ )  | $\beta_T$<br>( $\text{kJ mol}^{-1}$ ) | $R^2$  | $q_D$<br>( $\text{mg g}^{-1}$ ) | $E$<br>( $\text{kJ mol}^{-1}$ ) | $R^2$  |
| TC               | BHP-char                                       | 10.68                           | 0.2858                                | 0.7772 | 19.17                           | 5.9133                          | 0.7445 |
|                  | $\text{NH}_4\text{Cl-BHP-char/Fe}_3\text{O}_4$ | 70.99                           | 0.1745                                | 0.8038 | 45.92                           | 4.703                           | 0.9231 |
| $\text{Zn}^{2+}$ | BHP-char                                       | 7.99                            | 0.1288                                | 0.7459 | 38.83                           | 3.902                           | 0.7035 |
|                  | $\text{NH}_4\text{Cl-BHP-char/Fe}_3\text{O}_4$ | 128.59                          | 0.08468                               | 0.7880 | 108.20                          | 3.841                           | 0.9341 |

Table S5. Parameters of thermodynamic for the adsorption of TC and Zn(II) on BHP-char and NH<sub>4</sub>Cl-BHP-char/Fe<sub>3</sub>O<sub>4</sub>.

| Single-component<br>adsorption | Adsorbent                                                  | $\Delta G^\circ$<br>(KJ mol <sup>-1</sup> ) |          |         |         |         | $\Delta H^\circ$<br>(KJ mol <sup>-1</sup> ) | $\Delta S^\circ$<br>(KJ mol <sup>-1</sup> ) | R <sup>2</sup> |
|--------------------------------|------------------------------------------------------------|---------------------------------------------|----------|---------|---------|---------|---------------------------------------------|---------------------------------------------|----------------|
|                                |                                                            | 293K                                        | 298K     | 303K    | 308K    | 313K    |                                             |                                             |                |
|                                |                                                            | TC                                          | BHP-char | -1.346  | -2.588  | -3.830  |                                             |                                             |                |
|                                | NH <sub>4</sub> Cl-BHP-char/Fe <sub>3</sub> O <sub>4</sub> | -6.519                                      | -8.773   | -11.027 | -13.281 | -15.535 | 125.633                                     | 0.4508                                      | 0.9902         |
| Zn <sup>2+</sup>               | BHP-char                                                   | -2.948                                      | -4.748   | -6.548  | 8.348   | -10.148 | 102.586                                     | 0.3600                                      | 0.9991         |
|                                | NH <sub>4</sub> Cl-BHP-char/Fe <sub>3</sub> O <sub>4</sub> | -10.049                                     | -12.075  | -14.100 | -16.126 | -18.151 | 108.706                                     | 0.4051                                      | 0.9936         |
| Co-adsorption                  | Adsorbent                                                  | $\Delta G^\circ$<br>(KJ mol <sup>-1</sup> ) |          |         |         |         | $\Delta H^\circ$<br>(KJ mol <sup>-1</sup> ) | $\Delta S^\circ$<br>(KJ mol <sup>-1</sup> ) | R <sup>2</sup> |
|                                |                                                            | 293K                                        | 298K     | 303K    | 308K    | 313K    |                                             |                                             |                |
|                                |                                                            | TC                                          | BHP-char | -2.344  | -4.199  | -6.055  |                                             |                                             |                |
|                                | NH <sub>4</sub> Cl-BHP-char/Fe <sub>3</sub> O <sub>4</sub> | -8.167                                      | -10.301  | -12.434 | -14.568 | -16.701 | 116.920                                     | 0.4267                                      | 0.9989         |
| Zn <sup>2+</sup>               | BHP-char                                                   | -3.209                                      | -5.191   | -7.173  | -9.155  | -11.137 | 112.996                                     | 0.3964                                      | 0.9947         |
|                                | NH <sub>4</sub> Cl-BHP-char/Fe <sub>3</sub> O <sub>4</sub> | -12.299                                     | -13.858  | -15.417 | -16.976 | -18.535 | 79.105                                      | 0.3118                                      | 0.9961         |

Table S6. Constants of film diffusion model for TC and Zn(II) on BHP and NH<sub>4</sub>Cl-BHP-char/Fe<sub>3</sub>O<sub>4</sub>.

| Adsorbate                                         | Adsorbent                                                  | Film diffusion model          |         |                |
|---------------------------------------------------|------------------------------------------------------------|-------------------------------|---------|----------------|
|                                                   |                                                            | $k_F$<br>(min <sup>-1</sup> ) | A       | R <sup>2</sup> |
| TC<br>(Single-component adsorption)               | BHP-char                                                   | 0.0328                        | -0.2908 | 0.9725         |
|                                                   | NH <sub>4</sub> Cl-BHP-char/Fe <sub>3</sub> O <sub>4</sub> | 0.0298                        | -0.1342 | 0.9824         |
| Zn <sup>2+</sup><br>(Single-component adsorption) | BHP-char                                                   | 0.0734                        | -0.4123 | 0.9769         |
|                                                   | NH <sub>4</sub> Cl-BHP-char/Fe <sub>3</sub> O <sub>4</sub> | 0.0691                        | -0.5462 | 0.9761         |
| TC<br>(Co-adsorption)                             | BHP-char                                                   | 0.0779                        | -0.2350 | 0.9831         |
|                                                   | NH <sub>4</sub> Cl-BHP-char/Fe <sub>3</sub> O <sub>4</sub> | 0.0644                        | -0.0257 | 0.9692         |
| Zn <sup>2+</sup><br>(Co-adsorption)               | BHP-char                                                   | 0.0928                        | -0.7599 | 0.9778         |
|                                                   | NH <sub>4</sub> Cl-BHP-char/Fe <sub>3</sub> O <sub>4</sub> | 0.0965                        | -0.5068 | 0.9925         |



Table S7. Constants of Intra-particle diffusion model for TC and Zn(II) on BHP and NH<sub>4</sub>Cl-BHP-char/Fe<sub>3</sub>O<sub>4</sub>.

| Adsorbate                                         | Adsorbent                                                  | Intra-particle diffusion model        |                                |        |                                       |                                |        |
|---------------------------------------------------|------------------------------------------------------------|---------------------------------------|--------------------------------|--------|---------------------------------------|--------------------------------|--------|
|                                                   |                                                            | $k_{s1}$<br>(mg g min <sup>-1</sup> ) | $C_1$<br>(mg g <sup>-1</sup> ) | $R^2$  | $k_{s2}$<br>(mg g min <sup>-1</sup> ) | $C_2$<br>(mg g <sup>-1</sup> ) | $R^2$  |
| TC<br>(Single-component adsorption)               | BHP-char                                                   | 4.743                                 | 0.209                          | 0.9971 | 1.388                                 | 14.514                         | 0.9998 |
|                                                   | NH <sub>4</sub> Cl-BHP-char/Fe <sub>3</sub> O <sub>4</sub> | 8.977                                 | -5.610                         | 0.9566 | 3.745                                 | 9.867                          | 0.9987 |
| Zn <sup>2+</sup><br>(Single-component adsorption) | BHP-char                                                   | 8.768                                 | 1.919                          | 0.9785 | 2.141                                 | 23.114                         | 0.9525 |
|                                                   | NH <sub>4</sub> Cl-BHP-char/Fe <sub>3</sub> O <sub>4</sub> | 7.959                                 | 12.063                         | 0.9960 | 3.080                                 | 28.392                         | 0.9604 |
| TC<br>(Co-adsorption)                             | BHP-char                                                   | 7.678                                 | 0.042                          | 0.9977 | 1.844                                 | 22.965                         | 0.9301 |
|                                                   | NH <sub>4</sub> Cl-BHP-char/Fe <sub>3</sub> O <sub>4</sub> | 8.519                                 | -2.061                         | 0.9815 | 5.656                                 | 7.927                          | 0.9724 |
| Zn <sup>2+</sup><br>(Co-adsorption)               | BHP-char                                                   | 5.802                                 | 15.536                         | 0.9796 | 1.558                                 | 29.681                         | 0.9407 |
|                                                   | NH <sub>4</sub> Cl-BHP-char/Fe <sub>3</sub> O <sub>4</sub> | 7.892                                 | 13.812                         | 0.9846 | 4.288                                 | 24.733                         | 0.9670 |

---

## Text 1

### Determination of Zn(II)

FAAS determination conditions: Wavelength of 213.86 nm, hollow cathode lamp current of 15 mA, slit of 2.7/1.8 mm, airflow rate of 10 L min<sup>-1</sup>, and acetylene flow rate of 2.5 L min<sup>-1</sup>.

Preparation of 50 mg L<sup>-1</sup> standard solution of Zn(II): Transfer 5 mL of 1,000 mg L<sup>-1</sup> stock solutions of Zn(II) to a 100 mL volumetric flask, and dilute with ultrapure water to a specific volume.

Preparation of Zn(II) working standard solution: Transfer 0, 1.0, 2.0, 4.0, 6.0, 8.0 and 10.0 mL of 50 mg L<sup>-1</sup> standard solution of Zn(II) to a 50 mL volumetric flask, respectively, and dilute with 1% nitric acid to volume. Zn(II) working standard solution concentrations were 0, 1.0, 2.0, 4.0, 6.0, 8.0 and 10.0 mg L<sup>-1</sup>, respectively.

The linear relationship between absorbance and concentration is

$$y = 0.0567x + 0.438 \quad (R^2=0.9995)$$

### Determination of TC

Preparation of TC working standard solution: Transfer 0, 0.05, 0.1, 0.25, 0.5, 1.0, 1.5 and 2.0 mL of 1,000 mg L<sup>-1</sup> stock solutions of TC to a 100 mL volumetric flask, respectively, and dilute with ultrapure water to a specific volume. TC working standard solution concentrations were 0, 0.5, 1.0, 2.5, 5.0, 10.0, 15.0 and 20.0 mg L<sup>-1</sup>, respectively.

The linear relationship between absorbance and concentration is

$$y = 0.0354x + 0.2814 \quad (R^2=0.9992)$$

## Text 2

Pseudo-first order model  $\ln(q_e - q_t) = \ln q_e - k_1 t$

Pseudo-second order model  $\frac{t}{q_t} = \frac{1}{k_2 q_e^2} + \frac{t}{q_e}$

Film diffusion model  $\ln\left(1 - \frac{q_t}{q_e}\right) = -k_F t + A$

Intra-particle diffusion model  $q_t = k_s t^{1/2} + I$

---

where  $q_e$  ( $\text{mg g}^{-1}$ ) and  $q_t$  ( $\text{mg g}^{-1}$ ) are the amounts of TC or Zn(II) adsorbed on the biochar at equilibrium and at time  $t$  (min), respectively,  $k_1$  ( $1 \text{ min}^{-1}$ ) is the rate constant of pseudo-first order adsorption.  $k_2$  ( $\text{g mg}^{-1} \text{ min}^{-1}$ ) is the rate constant of pseudo-second order adsorption.  $k_f$  ( $1 \text{ min}^{-1}$ ) and  $A$  are liquid film diffusion constants, where  $k_s$  ( $\text{mg g}^{-1} \text{ min}^{-0.5}$ ) is the rate constant of intra-particle diffusion model, and  $I$  ( $\text{mg g}^{-1}$ ) is a constant describing the thickness of boundary layer.

### Text 3

Langmuir isotherm 
$$\frac{C_e}{q_e} = \frac{1}{q_L K_L} + \frac{C_e}{q_L}$$

Freundlich isotherm 
$$\ln q_e = \ln K_F + \frac{1}{n} \ln C_e$$

Temkin isotherm 
$$q_e = \frac{RT}{\beta_T} \ln(K_T C_e)$$

D-R isotherm 
$$\ln q_e = \ln q_D - \left(\frac{RT}{\sqrt{2E}}\right)^2 \times \left(\ln\left(1 + \frac{1}{C_e}\right)\right)^2$$

where  $q_L$  ( $\text{mg g}^{-1}$ ) is the Langmuir maximum adsorption capacity of TC or Zn(II),  $K_L$  ( $\text{L mg}^{-1}$ ) is the Langmuir constant termed as apparent energy of adsorption,  $K_F$  ( $(\text{mg g}^{-1}) (\text{L mg}^{-1})^{1/n}$ ) is the Freundlich constants related to adsorption capacity,  $n$  is a measure of adsorption linearity,  $\beta_T$  ( $\text{J mol}^{-1}$ ) is the Temkin constant related to heat of adsorption,  $K_T$  ( $\text{L g}^{-1}$ ) is the Temkin isotherm constant,  $R$  ( $8.314 \text{ J mol}^{-1} \text{ K}^{-1}$ ) is the gas constant,  $T$  ( $\text{K}$ ) is the absolute temperature,  $q_D$  ( $\text{mg g}^{-1}$ ) is the D-R maximum adsorption capacity of TC or Zn(II), and  $E$  ( $\text{J mol}^{-1}$ ) is mean free energy of adsorption per molecule of the adsorbate.

### Text 4

$$K_C = q_e / C_e$$

$$\Delta G^\circ = -RT \ln K_C$$

---

$$\Delta G^{\circ} = \Delta H^{\circ} - T\Delta S^{\circ}$$

$$\ln K_c = \frac{\Delta S^{\circ}}{R} - \frac{\Delta H^{\circ}}{RT}$$

where  $K_c$  ( $\text{ml g}^{-1}$ ) is the thermodynamic equilibrium constant.
